# Supplementary material for: AgBase: a functional genomics resource for agriculture
Source: PubMed Central journal article supplement (PMC1618847; doi:10.1186/1471-2164-7-229), 2006-09-08
Supplement: 1471-2164-7-229-S1.pdf [file 1471-2164-7-229-S1.pdf]

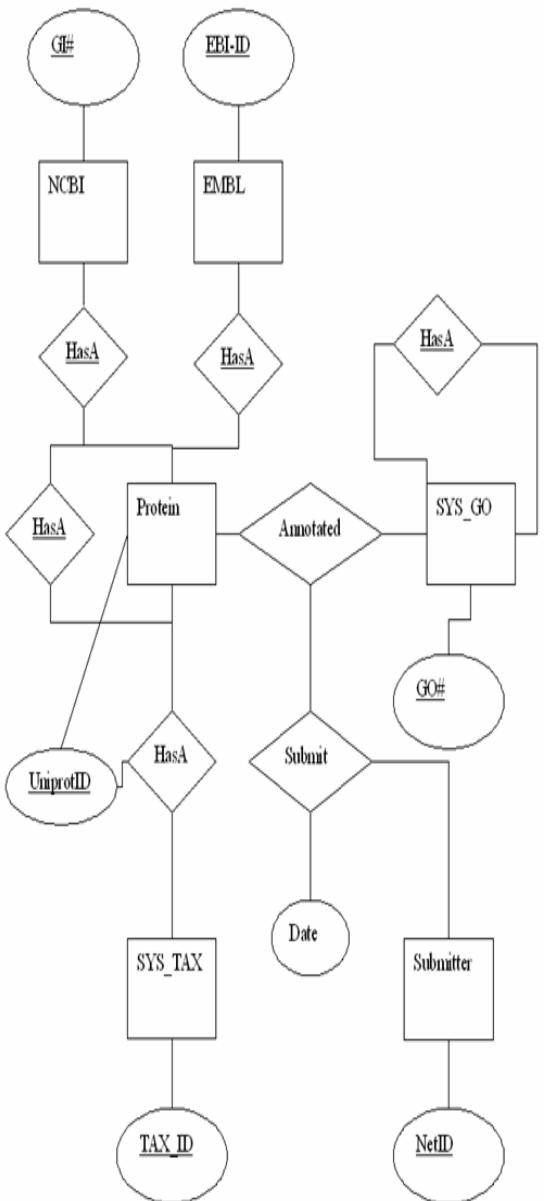

| Entity Name | Attributes                                   |
|-------------|----------------------------------------------|
| Protein     | (UniProt_ID, Protein_Name, Specie, SEQ, ...) |
| GO          | (GO_NUM, Description, Type, ...)             |
| Taxonomy    | (TAX_ID, Science_Name, Common_Name, ...)     |
| Submitter   | (Net_ID, Name, Password, Dep, Email, ...)    |

| Relationship Name    | Attributes                                                  | Entities                                              |
|----------------------|-------------------------------------------------------------|-------------------------------------------------------|
| Associated UniProtID | (UniProt_ID, AssociateU_ID)                                 | UniProtID $\leftrightarrow$ UniProtID                 |
| Associated EMBLID    | (UniProt_ID, AssociateEMBL_ID)                              | UniProtID $\leftrightarrow$ EMBLID                    |
| Associated GI        | (UniProt_ID, AssociateGI_NUM)                               | UniProtID $\leftrightarrow$ GI                        |
| Annotated            | (UniProt_ID, GO_NUM, Evidence_Code From, Value)             | Protein $\leftrightarrow$ GO                          |
| Submit               | (Submitter, Submit_date, UniProt_ID, GO_NUM, Evidence_Code) | Protein $\leftrightarrow$ GO $\leftrightarrow$ Author |
| HasTAX               | (UniProt_ID, TAX_ID)                                        | Protein $\leftrightarrow$ Taxonomy                    |
| HasParents           | (GO_NUM, Parent_ID)                                         | GO $\leftrightarrow$ GO                               |
