# Supplementary material for: AgBase: a functional genomics resource for agriculture
Source: PubMed Central journal article supplement (PMC1618847; doi:10.1186/1471-2164-7-229), 2006-09-08
Supplement: 1471-2164-7-229-S4.pdf [file 1471-2164-7-229-S4.pdf]

## Channel Catfish Proteins (cfNRPD)

|    |                                                                                       |
|----|---------------------------------------------------------------------------------------|
| 1  | gi 31339953 sp O42197 B2MG_ICTPU Beta-2-microglobulin precursor                       |
| 2  | gi 52219464 gb AAU29515.1  natural killer cell enhancing factor [Ictalurus punctatus] |
| 3  | gi 46577102 sp Q90YU5 RL23_ICTPU 60S ribosomal protein L23                            |
| 4  | gi 47606688 gb AAT36327.1  Fas receptor [Ictalurus punctatus]                         |
| 5  | gi 28932676 gb AAO60426.1  sodium channel 7 [Ictalurus punctatus]                     |
| 6  | gi 15294017 gb AAK95185.1  40S ribosomal protein S3a [Ictalurus punctatus]            |
| 7  | gi 44887609 gb AAS48084.1  myogenin [Ictalurus punctatus]                             |
| 8  | gi 15294021 gb AAK95187.1 AF402813_1 40S ribosomal protein S5 [Ictalurus punctatus]   |
| 9  | gi 47117268 sp Q90YQ4 RS19_ICTPU 40S ribosomal protein S19                            |
| 10 | gi 44887605 gb AAS48082.1  follistatin [Ictalurus punctatus]                          |

## Highly homologous proteins (hpDB)

|    |                                                                                                           |
|----|-----------------------------------------------------------------------------------------------------------|
| 1  | TC6967.p1 [968.43.924 Cerr] similar to ANX1_HUMAN (P04083) Annexin A1 (Annexin I) (Lipocortin I)          |
| 2  | TC6931.p1 [881.67.880 Cmis] similar to ACTC_FUGRU (P53480) Actin, alpha cardiac                           |
| 3  | TC8258.p1 [2440.107.1231] similar to ACTB_CYPCA (P83750) Actin, cytoplasmic 1 (Beta-actin)                |
| 4  | CK420691.p1 [858.109.642 unknown] hypothetical protein (EST-Analyzer)                                     |
| 5  | TC8481.p1 [1306.99.677] similar to RHOA_RAT (P61589) Transforming protein RhoA                            |
| 6  | CK419489.p1 [619.40.306 Nerr] similar to IDHP_PIG (P33198) Isocitrate dehydrogenase [NADP], mitochondrial |
| 7  | TC9232.p1 [1199.157.1199 Cmis] similar to CN37_HUMAN (P09543) 2',3'-cyclic-nucleotide 3'-phosphodiester   |
| 8  | TC6714.p1 [1226.118.465] similar to B2MG_ICTPU (O42197) Beta-2-microglobulin precursor                    |
| 9  | TC6915.p1 [1074.39.635] similar to TDX_CYNPY (Q90384) Thioredoxin peroxidase                              |
| 10 | TC6799.p1 [514.41.460] similar to RL23_RAT (P62832) 60S ribosomal protein L23                             |
| 11 | CK414619.p1 [858.246.821] similar to RAC1_RAT (Q6RUV5) Ras-related C3 botulinum toxin substrate 1         |
| 12 | TC9389.p1 [1375.102.1035] similar to RSF2_HUMAN (P50749) Ras association domain family 2                  |
| 13 | BM438442.p1 [783.1.381 Nmis] similar to CFAB_PANTR (Q864W0) Complement factor B precursor                 |
| 14 | TC6961.p1 [1033.49.1032 Cmis] similar to IF2G_HUMAN (P41091) Eukaryotic translation initiation factor     |
| 15 | TC6897.p1 [972.88.540] similar to NPC2_BRARE (Q9DGJ3) Epididymal secretory protein E1 precursor           |
| 16 | BE469146.p1 [849.225.847 Cmis] similar to ITB0_XENLA (P12607) Integrin beta-1* precursor                  |
| 17 | TC9768.p1 [723.3.509 Nmis] similar to T134_MOUSE (Q9D7W4) Tetraspan protein SB134                         |
| 18 | CB937074.p1 [841.165.839] similar to ARDH_MOUSE (Q9QY36) N-terminal acetyltransferase complex ARD1        |
| 19 | BE469854.p1 [628.2.190 Nmis] similar to ACTB_STRPU (P53473) Actin, cytoskeletal                           |
| 20 | BE469527.p1 [776.2.634 Nmis Cerr] similar to HGFA_MOUSE (Q9R098) Hepatocyte growth factor activator       |
| 21 | NP625806.p1 [1466.1.1464 NCmis] similar to CIN2_RAT (P04775) Sodium channel protein type II alpha         |
| 22 | TC6693.p1 [1676.1.1485 Nmis] similar to CHIA_HUMAN (Q9BZP6) Acidic mammalian chitinase precursor          |
| 23 | CB938994.p1 [782.171.665] similar to TPC6_HUMAN (Q86SZ2) Trafficking protein particle complex subunit     |
| 24 | TC8288.p1 [1842.123.1128] similar to G3P_ONCMY (O42259) Glyceraldehyde-3-phosphate dehydrogenase          |
| 25 | TC6754.p1 [948.1.855 Nmis] similar to RS3A_ORYLA (O73813) 40S ribosomal protein S3a                       |
| 26 | TC8719.p1 [1187.157.836] similar to GTA_PLEPL (P30568) Glutathione S-transferase A (EC 2.5.1.18)          |
| 27 | TC7671.p1 [904.3.843 Nmis] similar to LIPL_CHICK (P11602) Lipoprotein lipase precursor                    |
| 28 | TC8702.p1 [1020.81.488] similar to H33_HUMAN (P06351) Histone H3.3 (H3.A) (H3.B) (H3.3Q)                  |
| 29 | TC8601.p1 [1477.58.1069] similar to ANX2_HUMAN (P07355) Annexin A2 (Annexin II) (Lipocortin II)           |
| 30 | CK418739.p1 [917.2.835 Nmis] similar to IMA1_XENLA (P52170) Importin alpha-1 subunit                      |
| 31 | TC9242.p1 [1446.129.1331] similar to RT29_HUMAN (P51398) Mitochondrial 28S ribosomal protein S29          |
| 32 | TC8398.p1 [988.1.647 Nmis] similar to RS5_HUMAN (P46782) 40S ribosomal protein S5                         |
| 33 | BE469200.p1 [997.84.911 Cerr] similar to SUH_XENLA (Q91880) Suppressor of hairless protein homolog        |
| 34 | TC8415.p1 [628.47.487] similar to RS19_ICTPU (Q90YQ4) 40S ribosomal protein S19                           |
| 35 | TC9648.p1 [940.3.744 Nmis] similar to ABB2_HUMAN (Q92870) Amyloid beta A4 precursor protein-binding       |
| 36 | TC7105.p1 [1744.133.1287] similar to RIR2_BRARE (P79733) Ribonucleoside-diphosphate reductase M2 channel  |
| 37 | TC7974.p1 [991.53.988] similar to FSA_BRARE (Q9YHV4) Follistatin precursor (FS)                           |
| 38 | TC7181.p1 [1024.113.880 Cerr] similar to IF2A_RAT (P68101) Eukaryotic translation initiation factor       |
| 39 | BM494897.p1 [429.47.427 Cmis] similar to PDA6_MESAU (P38660) Protein disulfide-isomerase A6 precurs       |

40 TC9327.p1 [597.54.596 Cmis] similar to FABG\_THEMA (Q9X248) 3-oxoacyl-[acyl-carrier-protein] reductase  
41 CK419980.p1 [942.177.917 Nerr] similar to ITB3\_HUMAN (P05106) Integrin beta-3 precursor  
42 TC6628.p1 [1147.99.590] similar to CYPH\_HEMPU (P91791) Peptidyl-prolyl cis-trans isomerase  
43 TC8746.p1 [877.106.741] similar to GS27\_MOUSE (O35166) 27 kDa Golgi SNARE protein  
44 BM495435.p1 [501.2.499 NCmis] similar to HA1F\_CHICK (P15979) Class I histocompatibility antigen, F1  
45 CB940762.p1 [705.2.703 Nmis] similar to ELM1\_MOUSE (Q8BPU7) Engulfment and cell motility protein 1  
46 CK424308.p1 [937.3.916 Nmis Cerr] similar to SMY1\_HUMAN (Q8NB12) SET and MYND domain containing protein  
47 TC8362.p1 [1653.103.1233] similar to ACTA\_RAT (P62738) Actin, aortic smooth muscle (Alpha-actin 2)  
48 TC7279.p1 [1244.469.1175 NCerr] similar to YY46\_ANASP (Q8YR11) Hypothetical WD-repeat protein alr34

## Untranslated ESTs

1 TC11388 UP|Q6P3K9 (Q6P3K9) Bactin1 protein, complete  
2 TC10436 UP|Q5XJK2 (Q5XJK2) Zgc:101846, partial (88%)  
3 TC10059 homologue to UP|ATPB\_CYPKA (Q9PTY0) ATP synthase beta chain, mitochondrial precursor  
4 TC9911 homologue to UP|Q800W9 (Q800W9) Elongation factor 1-alpha, complete  
5 CK421703 AUF\_lpSpn\_61\_p04 Spleen cDNA library Ictalurus punctatus cDNA 5- similar to histone H4  
6 TC10105 similar to UP|Q9I9D1 (Q9I9D1) Voltage-dependent anion channel, complete  
7 TC11389 UP|ACT2\_XENLA (P10995) Actin, alpha sarcomeric/cardiac (Alpha 2), complete  
8 TC10060 homologue to UP|Q910C4 (Q910C4) Mitochondrial ATP synthase alpha-subunit, complete  
9 BM494161 lpCGBr1\_13\_G06\_21 Ictalurus punctatus Brain1 primary library Ictalurus punctatus cDNA clone  
10 TC10174 similar to UP|Q804H2 (Q804H2) Annexin 1a, partial (81%)  
11 TC11605 GB|AAH04274.2|48257076|BC004274 H2A histone family, member V, isoform 1  
12 TC10211 homologue to UP|Q7T334 (Q7T334) Zgc:64133, complete  
13 TC11535 homologue to UP|Q7ZU62 (Q7ZU62) Ik:tdsubc\_1f2 protein (Fragment), partial (95%)  
14 TC10100 similar to PIR|C28456|C28456 histone H1.11R - chicken {Gallus gallus;} , partial (84%)  
15 CK416763 AUF\_lpInt\_53\_i17 Intestine cDNA library Ictalurus punctatus cDNA 5- similar to MAD2L1 binding protein  
16 CK420763 AUF\_lpTrk\_27\_k07 Trunk kidney cDNA library Ictalurus punctatus cDNA 5- similar to XP\_148064  
17 TC11393 UP|Q6DHS1 (Q6DHS1) Actin, alpha 2, smooth muscle, aorta, complete  
18 TC12761 homologue to UP|Q6PC12 (Q6PC12) Enolase 1, (Alpha), partial (44%)  
19 TC9868 UP|Q6NW90 (Q6NW90) Tubulin, beta 5, partial (72%)  
20 CK419489 AUF\_lpOva\_21\_c10 Ovary cDNA library Ictalurus punctatus cDNA 5- similar to isocitrate dehydrogenase  
21 TC9991 homologue to UP|Q6NYM9 (Q6NYM9) Zgc:76908, complete  
22 TC10214 similar to UP|Q5WU20 Hypothetical protein  
23 TC9941 similar to UP|Q6PC16 (Q6PC16) NADH dehydrogenase (Ubiquinone) 1 beta subcomplex, 10  
24 TC10129 UP|RS28\_BRARE (Q6PBK3) 40S ribosomal protein S28, complete  
25 TC9922 similar to UP|Q91219 (Q91219) Simple type II keratin K8b (S2), partial (92%)  
26 TC10083 similar to UP|Q803D7 (Q803D7) Sb:cb825 protein (Fragment), complete  
27 TC11569 UP|Q643S2 (Q643S2) Natural killer cell enhancing factor, complete  
28 CB940355 lpCGJx14\_12\_B09\_23 lpCGJx14 Ictalurus punctatus cDNA clone  
29 TC11453 UP|Q90YP1 (Q90YP1) 40S ribosomal protein S30, complete  
30 TC9992 homologue to UP|Q6P3J5 (Q6P3J5) Eukaryotic translation elongation factor 2, like, complete  
31 CK419560 AUF\_lpOva\_21\_f21 Ovary cDNA library Ictalurus punctatus cDNA  
32 TC12903 similar to UP|RLA2\_RAT (P02401) 60S acidic ribosomal protein P2, partial (89%)  
33 TC10096 UP|Q90YU4 (Q90YU4) Ribosomal protein L23a (Fragment), partial (97%)  
34 TC11884 homologue to UP|Q803B0 (Q803B0) Hspd1 protein (Heat shock 60 kD protein 1), partial (47%)  
35 CK420617 AUF\_lpTrk\_27\_d14 Trunk kidney cDNA library Ictalurus punctatus cDNA  
36 TC13096 homologue to UP|Q6IQM2 (Q6IQM2) Zgc:86706, complete  
37 CK420691  
38 BE574223  
39 CK426292  
40 CK418481  
41 CK420260

42 CV989760  
43 CK414118  
44 CK414852  
45 CK425397  
46 TC11353  
47 CV989802  
48 TC12693 similar to UP|Q6NSM8 (Q6NSM8) Zgc:66101 protein, partial (21%)  
49 TC13120 homologue to UP|Q90YD5 (Q90YD5) GTP binding protein Rab1a (Fragment), partial (94%)  
50 TC12257 similar to UP|Q6NZM9 (Q6NZM9) Histone deacetylase 4, partial (4%)  
51 TC12552 similar to UP|Q7T345 (Q7T345) Zgc:64115, partial (54%)  
52 CK414088  
53 TC13191 similar to UP|Q7T366 (Q7T366) Membrin, complete  
54 CK418100  
55 CK412064  
56 CK416857  
57 CK415924  
58 TC11800 weakly similar to UP|Q8JG42 (Q8JG42) Caspase 3, partial (72%)  
59 CK415197  
60 TC11773 similar to UP|Q8AVU0 (Q8AVU0) MGC52838 protein, partial (55%)  
61 TC13851 weakly similar to UP|Q891V8 (Q891V8) Virulence factor mviN, partial (4%)  
62 TC10247 similar to UP|Q6PBR9 (Q6PBR9) Tumor necrosis factor superfamily, member 5-induced protein 1  
63 CK425448  
64 TC13000 similar to UP|NPC2\_BRARE (Q9DGJ3) Epididymal secretory protein E1 precursor  
65 CK424907  
66 CV995186  
67 TC9978 similar to PIR|S24401|S24401 tropomyosin 2, skeletal muscle alpha splice form CTm4  
68 TC10042 similar to UP|143B\_HUMAN (P31946) 14-3-3 protein beta/alpha (Protein kinase C inhibitor protein-1)  
69 TC11582 homologue to UP|Q6DHM9 (Q6DHM9) Small GTPase RhoA, complete  
70 TC10384 similar to UP|Q6PC77 (Q6PC77) ATP synthase, H+ transporting, mitochondrial F0 complex subunit d  
71 TC10104 UP|Q6YNX6 (Q6YNX6) Calmodulin 2, complete  
72 TC12887 UP|RS18\_ICTPU (Q90YQ5) 40S ribosomal protein S18, complete  
73 TC10216 similar to UP|Q804G3 (Q804G3) Annexin 11b (Annexin A11b), partial (28%)  
74 TC10353 similar to UP|Q6IHK7 (Q6IHK7) HDC02322, complete  
75 TC12988 homologue to UP|Q6PC12 (Q6PC12) Enolase 1, (Alpha), partial (65%)  
76 TC13055 similar to UP|Q90306 (Q90306) G-RICH, partial (55%)  
77 TC12869 similar to UP|Q8JJB2 (Q8JJB2) Cold inducible RNA-binding protein alpha, partial (69%)  
78 TC12547 homologue to UP|Q90YW8 (Q90YW8) Ribosomal protein L3, partial (42%)  
79 TC11716 similar to UP|PDX3\_BOVIN (P35705) Thioredoxin-dependent peroxide reductase  
80 TC10240 homologue to UP|Q6PBW4 (Q6PBW4) Zgc:73214 protein, complete  
81 CV996902  
82 TC12877 UP|RL19\_ICTPU (Q90YU8) 60S ribosomal protein L19, complete  
83 TC10055 homologue to GB|AAH49038.1|29294663|BC049038 zgc:73149 protein {Danio rerio;}  
84 TC13122 similar to UP|Q6P0S2 (Q6P0S2) Zgc:77898, partial (83%)  
85 TC11425 UP|B2MG\_ICTPU (O42197) Beta-2-microglobulin precursor, complete  
86 TC11438 SP|P05213|TBA2\_MOUSE Tubulin alpha-2 chain (Alpha-tubulin 2). {Mus musculus;} , complete  
87 CK422925  
88 CB936554  
89 TC13114 UP|Q90YU2 (Q90YU2) Ribosomal protein L26, complete  
90 BE468503  
91 TC10062 UP|Q90YT9 (Q90YT9) Ribosomal protein L28, complete  
92 CB939493  
93 TC11501 similar to UP|Q7ZVA4 (Q7ZVA4) Zgc:56142, partial (91%)

94 CK415460  
95 CK411904  
96 TC11523 homologue to UP|Q6TL18 (Q6TL18) HSP-90, complete  
97 TC12888 UP|Q90YT2 (Q90YT2) Ribosomal protein L36, complete  
98 TC10615 UP|Q90WT7 (Q90WT7) BC-10 protein, complete  
99 CV995669  
100 TC12938 homologue to UP|Q6Y218 (Q6Y218) Ras-related C3 botulinum toxin substrate 2, complete  
101 TC12942 GB|AAK95195.1|15294037|AF402821 40S ribosomal protein S13 {Ictalurus punctatus;} , complete  
102 CK417659  
103 CK415733  
104 TC13288  
105 TC12892 UP|RS23\_ICTPU (Q90YQ1) 40S ribosomal protein S23, complete  
106 TC12316 similar to UP|FLNA\_MOUSE (Q8BTM8) Filamin A (Alpha-filamin) (Filamin 1)  
107 CK412831  
108 TC11785 similar to UP|Q68ER0 (Q68ER0) Chchd2-prov protein, partial (81%)  
109 TC13213  
110 CV990616  
111 CK415335  
112 TC11490 UP|RS25\_ICTPU (Q90YP9) 40S ribosomal protein S25, complete  
113 CK414020  
114 TC10207  
115 CV992009  
116 CK424562  
117 TC13605  
118 CV993102  
119 CK416915  
120 CK413231  
121 CB939967  
122 CK416812  
123 TC12028 similar to UP|Q90YX4 (Q90YX4) P27-like cyclin-dependent kinase inhibitor, partial (19%)  
124 CK414217  
125 CK424024  
126 CV994486  
127 TC9972 homologue to UP|Q7ZVK9 (Q7ZVK9) Zgc:55951 protein, complete  
128 CK422723  
129 CF262295  
130 CK417534  
131 CK414678  
132 TC10148 homologue to UP|Q8JHI0 (Q8JHI0) Solute carrier family 25 member 5 protein  
133 TC11771 homologue to UP|MO1B\_HUMAN (Q9H8S9) Mps one binder kinase activator-like 1B  
134 TC11735 UP|Q5XJK2 (Q5XJK2) Zgc:101846, partial (95%)  
135 TC11863 GB|AAA38496.1|554015|MUSIGHV01B Ig heavy chain precursor {Mus musculus;} , partial (30%)  
136 CK412100  
137 CF262894  
138 TC10106 similar to UP|Q6PH75 (Q6PH75) Cathepsin B, partial (97%)  
139 CV996746  
140 TC12955 similar to UP|Q6IQU9 (Q6IQU9) Zgc:86599, partial (96%)  
141 CK414635  
142 BE469301  
143 BM494698  
144 BE470286  
145 CK418935

146 BM494799  
147 CK412965  
148 CK421032  
149 CK423069  
150 CK414040  
151 TC9917 similar to UP|Q6TNR6 (Q6TNR6) Peptidylprolyl isomerase A, complete  
152 CK411538  
153 TC11853 similar to UP|Q71SZ2 (Q71SZ2) Cytochrome c oxidase subunit Va, complete  
154 CV992715  
155 CK415741  
156 BM494423  
157 CK419518  
158 BM495980  
159 TC10601 similar to GB|AAC52724.1|1354501|MMU54639 RaiGDS-like factor {Mus musculus;} , partial (6%)  
160 CK414803  
161 TC10176 homologue to UP|Q7SZR4 (Q7SZR4) Phosphoglycerate mutase 1, complete  
162 BE470169  
163 TC13007 homologue to UP|Q5SPJ6 (Q5SPJ6) Protein tyrosine phosphatase, receptor type, D, partial  
164 CF263658  
165 CK412701  
166 CB940672  
167 CK425552  
168 CK413831  
169 CV987758  
170 CK423956  
171 CK417670  
172 CK415236  
173 CK411897  
174 CK413651  
175 TC12899 GB|AAK95200.1|15294047|AF402826 40S ribosomal protein S17 {Ictalurus punctatus;} , complete  
176 TC13522 similar to UP|Q5TB85 (Q5TB85) OTTHUMP00000016079 (Fragment), partial (51%)  
177 CK411005  
178 CV996460  
179 CK420472  
180 TC14075 similar to UP|O93447 (O93447) Annexin max4, partial (51%)  
181 TC11378 weakly similar to UP|Q62775 (Q62775) SH3 domain binding protein, partial (11%)  
182 BM494415  
183 TC9880 UP|Q6IQJ2 (Q6IQJ2) Zgc:55461, complete  
184 CV995775  
185 CK423025  
186 TC11377 similar to UP|Q8VI80 (Q8VI80) Fibroblast growth factor 21, partial (10%)  
187 CB936723  
188 TC11363 similar to GB|AAB41498.1|1805280|HSU83867 alpha II spectrin {Homo sapiens;} , partial (15%)  
189 CK418024  
190 CK418389  
191 TC11560 homologue to UP|Q6P959 (Q6P959) Mitochondrial ATP synthase gamma-subunit, complete  
192 TC9858 weakly similar to UP|Q6CEC8 (Q6CEC8) Similarity, partial (3%)  
193 CK422385  
194 CK415039  
195 CV994751  
196 CK425597  
197 BM424844

|     |                                                                                                        |
|-----|--------------------------------------------------------------------------------------------------------|
| 198 | BM494706                                                                                               |
| 199 | CK417216                                                                                               |
| 200 | CK417758                                                                                               |
| 201 | CV988733                                                                                               |
| 202 | CV991573                                                                                               |
| 203 | CK414937                                                                                               |
| 204 | CV988587                                                                                               |
| 205 | BM494124                                                                                               |
| 206 | TC10073 similar to UP Q8JIP8 (Q8JIP8) Warm-temperature-acclimation-related-65 kDa-protein-like-protein |
| 207 | CK421805                                                                                               |
| 208 | BM029064                                                                                               |
| 209 | TC10296 homologue to GB AAM53975.1 21435808 AF515726 translational eukaryotic initiation factor 4A     |
| 210 | CV990065                                                                                               |
| 211 | CK423313                                                                                               |
| 212 | BM027884                                                                                               |
| 213 | CB939552                                                                                               |
| 214 | BM029527                                                                                               |
| 215 | TC13731 similar to UP SKB1_HUMAN (O14744) Protein arginine N-methyltransferase 5                       |
| 216 | CK419729                                                                                               |
| 217 | TC12129 weakly similar to UP Q672Y9 (Q672Y9) CC chemokine SCYA103, partial (72%)                       |
| 218 | CK413534                                                                                               |
| 219 | CK421744                                                                                               |
| 220 | TC12175 weakly similar to UP O93268 (O93268) Aminopeptidase N , partial (22%)                          |
| 221 | CK413486                                                                                               |
| 222 | BM494051                                                                                               |
| 223 | CV993251                                                                                               |
| 224 | TC10306 weakly similar to UP Q5U3F5 (Q5U3F5) Zgc:103602, partial (20%)                                 |
| 225 | TC10499 homologue to UP Q6TXI9 (Q6TXI9) LRRGT00010, partial (22%)                                      |
| 226 | CV990323                                                                                               |
| 227 | CK418029                                                                                               |
| 228 | BE470192                                                                                               |
| 229 | CK419721                                                                                               |
| 230 | TC11759 similar to UP Q6NYW8 (Q6NYW8) Heterogeneous nuclear ribonucleoprotein A0, partial (74%)        |
| 231 | CK425323                                                                                               |
| 232 | BM438934                                                                                               |
| 233 | TC13408 similar to UP Q7T323 (Q7T323) Zinc finger, DHHC domain containing 4, partial (91%)             |
| 234 | BM494336                                                                                               |
| 235 | CV996550                                                                                               |
| 236 | CK413278                                                                                               |
| 237 | BE469111                                                                                               |
| 238 | CV996663                                                                                               |
| 239 | CK419079                                                                                               |
| 240 | CV991217                                                                                               |
| 241 | CK421667                                                                                               |
| 242 | BM494958                                                                                               |
| 243 | CV990298                                                                                               |
| 244 | CV991507                                                                                               |
| 245 | TC11908 similar to UP Q66I80 (Q66I80) Zgc:103587, complete                                             |
| 246 | CK412610                                                                                               |
| 247 | CK424018                                                                                               |
| 248 | TC13201                                                                                                |
| 249 | BM029228                                                                                               |

250 CK417256  
251 TC12972 homologue to UP|Q7ZV13 (Q7ZV13) Zgc:56283, partial (94%)  
252 CK418357  
253 CK419254  
254 CV991262  
255 CK416966  
256 CK424403  
257 CK424853  
258 CB939040  
259 CK415258  
260 CK418488  
261 CK417222  
262 TC10003 homologue to UP|Q8JHI0 (Q8JHI0) Solute carrier family 25 member 5 protein  
263 TC13121 similar to UP|Q8AVH4 (Q8AVH4) MGC53417 protein (NOB1 protein), partial (83%)  
264 CK415238  
265 CK420747  
266 TC10185 UP|MVP\_ICTPU (Q9DGM7) Major vault protein (MVP) (Fragment), complete  
267 CK419262  
268 TC10625 homologue to UP|Q6DGJ6 (Q6DGJ6) Zgc:92891, complete  
269 CV996769  
270 TC13810 similar to UP|O97757 (O97757) Superfast myosin heavy chain, partial (6%)  
271 BM438369  
272 TC10041 UP|Q90YR9 (Q90YR9) 40S ribosomal protein S5, complete  
273 BE468421  
274 TC13491  
275 CK425301  
276 TC11833 homologue to GB|AAH02602.2|37589900|BC002602 UREB1 protein {Homo sapiens;} , partial (40%)  
277 TC11367 similar to UP|Q751I3 (Q751I3) AGL277Wp, partial (3%)  
278 CK413326  
279 CF261686  
280 CK416206  
281 CF263757  
282 CK417514  
283 BM496167  
284 CK412150  
285 TC11574 similar to UP|Q6P603 (Q6P603) Annexin A2a, complete  
286 CV987986  
287 CK425028  
288 CK421973  
289 TC12106 weakly similar to UP|MYOC\_BOVIN (Q9XTA3) Myocilin precursor  
290 CK420777  
291 CV993748  
292 CK417601  
293 CV989743  
294 CV989735  
295 TC11533 similar to UP|Q6P6Y0 (Q6P6Y0) Transaldolase 1, complete  
296 CK419392  
297 TC13481  
298 TC11430 homologue to GB|AAK95132.1|15293879|AF401560 ribosomal protein L7a {Ictalurus punctatus;}  
299 TC11699 similar to UP|Q86XB5 (Q86XB5) LOC136288 protein (Fragment), partial (14%)  
300 BM029046  
301 CB938495

|     |                                                                                                 |
|-----|-------------------------------------------------------------------------------------------------|
| 302 | CF261661                                                                                        |
| 303 | CV989006                                                                                        |
| 304 | BM438928                                                                                        |
| 305 | CK421941                                                                                        |
| 306 | CF263388                                                                                        |
| 307 | BE213004                                                                                        |
| 308 | CK410776                                                                                        |
| 309 | CF263546                                                                                        |
| 310 | CF262962                                                                                        |
| 311 | BM496673                                                                                        |
| 312 | TC13622 weakly similar to UP Q98C58 (Q98C58) Acetyl-coa synthetase, partial (6%)                |
| 313 | CK414007                                                                                        |
| 314 | CK420866                                                                                        |
| 315 | CK420274                                                                                        |
| 316 | TC9926 UP Q8CHU4 (Q8CHU4) Pi16 protein (Fragment), partial (4%)                                 |
| 317 | BM438759                                                                                        |
| 318 | CK425679                                                                                        |
| 319 | TC14152                                                                                         |
| 320 | TC14102                                                                                         |
| 321 | CK423915                                                                                        |
| 322 | CK412904                                                                                        |
| 323 | BM439119                                                                                        |
| 324 | CK414630                                                                                        |
| 325 | CK423887                                                                                        |
| 326 | CV992447                                                                                        |
| 327 | CF262658                                                                                        |
| 328 | TC9918 homologue to emb X59733.1 XB28SRRNA X.borealis 28S ribosomal RNA gene for 28S rRNA       |
| 329 | CV994596                                                                                        |
| 330 | CF263287                                                                                        |
| 331 | CK417182                                                                                        |
| 332 | CF263425                                                                                        |
| 333 | BM494881                                                                                        |
| 334 | BM495311                                                                                        |
| 335 | CV994144                                                                                        |
| 336 | CF263265                                                                                        |
| 337 | CK415622                                                                                        |
| 338 | CV991253                                                                                        |
| 339 | CV989391                                                                                        |
| 340 | CK414829                                                                                        |
| 341 | CK410283                                                                                        |
| 342 | CF262823                                                                                        |
| 343 | TC13839 similar to GB AAH61475.1 38181905 BC061475 D6Ert538e protein {Mus musculus;}            |
| 344 | CK413565                                                                                        |
| 345 | CK418345                                                                                        |
| 346 | TC12064                                                                                         |
| 347 | CV992387                                                                                        |
| 348 | CK426178                                                                                        |
| 349 | CB936601                                                                                        |
| 350 | TC10613 similar to GB AAH40802.1 27371005 BC040802 Eprs protein {Mus musculus;} , partial (19%) |
| 351 | CV990560                                                                                        |
| 352 | CK417775                                                                                        |
| 353 | CK417352                                                                                        |



354 BM497006  
355 BE469200  
356 TC12653 UP|Q89418 (Q89418) A83R protein, partial (11%)  
357 CK421989  
358 CK422033  
359 CK411053  
360 BM029380  
361 CF262234  
362 CK414559  
363 TC13021 homologue to UP|Q6P043 (Q6P043) Zgc:77696, partial (90%)  
364 CK425408  
365 CV990586  
366 CK414551  
367 CK425276  
368 TC12513 homologue to UP|Q6IQW1 (Q6IQW1) BMP and activin membrane-bound inhibitor, partial (28%)  
369 CB937987  
370 CV996410  
371 CK416617  
372 TC10937 weakly similar to UP|Q9FIL2 (Q9FIL2) Gb|AAD32776.1, partial (12%)  
373 CK424574  
374 CF262607  
375 CV994390  
376 CK413597  
377 TC11620 similar to UP|Q6DRD1 (Q6DRD1) ATP synthase oligomycin sensitivity conferral protein, complete  
378 CK423708  
379 TC13047 similar to UP|Q804W1 (Q804W1) Parvalbumin isoform 4b (Zgc:103753 protein), complete  
380 CK423577  
381 BM028020  
382 CK420281  
383 CK421087  
384 CK415475  
385 CK412981  
386 BE470123  
387 CK417192  
388 TC9853 similar to GB|BAA85772.1|6116905|AB033770 thymosin beta {Oncorhynchus mykiss;} , complete  
389 TC9981 similar to UP|Q9DEQ2 (Q9DEQ2) Beta thymosin, complete  
390 CK415113  
391 CK412325  
392 TC11682 similar to UP|143B\_MOUSE (Q9CQV8) 14-3-3 protein beta/alpha (Protein kinase C inhibitor protein-1)  
393 CV996939  
394 BE470214  
395 TC11534 similar to UP|Q7ZY54 (Q7ZY54) M(2)21ab-prov protein, partial (95%)  
396 TC13816 weakly similar to UP|Q6J8F7 (Q6J8F7) Capsid protein, partial (3%)  
397 BE212628  
398 CK421182  
399 TC11027  
400 CK409777  
401 TC13479  
402 TC10270 homologue to UP|Q6TNQ9 (Q6TNQ9) Succinate dehydrogenase complex, subunit A, flavoprotein  
403 TC13411 weakly similar to UP|Q6ZQ50 (Q6ZQ50) MKIAA0776 protein (Fragment), partial (26%)  
404 CK414295  
405 CK419893

406 TC14125 similar to UP|Q6GMK9 (Q6GMK9) Zgc:91855, partial (66%)  
407 CV993617  
408 CV991166  
409 CK414726  
410 CF262079  
411 TC11571 similar to UP|Q90362 (Q90362) G-crystallin, complete  
412 CK426036  
413 CK416392  
414 CK418701  
415 CK415409  
416 CV991514  
417 BM438442  
418 TC11721 weakly similar to UP|HEXB\_FELCA (P49614) Beta-hexosaminidase beta chain precursor  
419 BE469500  
420 CK421578  
421 TC12668 similar to UP|Q865L8 (Q865L8) Decay-accelerating factor CD55, partial (10%)  
422 CF262529  
423 TC10236  
424 CK416538  
425 CK421756  
426 TC13844  
427 CK424593  
428 CB936582  
429 CK422623  
430 BM425454  
431 BM495343  
432 TC10959 weakly similar to UP|Q72EF7 (Q72EF7) Sigma-54 dependent DNA-binding response regulator  
433 TC13727 weakly similar to UP|CCDA\_CAEEL (P35800) Cuticle collagen dpy-10 precursor  
434 BM029579  
435 TC10435 similar to UP|GAS5\_YEAST (Q08193) Glycolipid anchored surface protein 5 precursor, partial  
436 CV995572  
437 CK425875  
438 TC13711 similar to UP|K6PP\_HUMAN (Q01813) 6-phosphofructokinase, type C (Phosphofructokinase 1)  
439 CK416875  
440 TC11206  
441 CK413646  
442 CK410524  
443 BE470482  
444 BM494261  
445 CK416733  
446 CK415620  
447 CB938949  
448 CV990906  
449 TC14056 UP|Q9IB48 (Q9IB48) Nonclathrin coat protein zeta1-COP, complete  
450 CK422904  
451 CK415800  
452 BE212837  
453 CK423089  
454 BE469527  
455 CF262863  
456 TC13026  
457 CK424137

458 TC14215  
459 CK414346  
460 CV988305  
461 TC10377 homologue to UP|Q801E8 (Q801E8) Cytosolic malate dehydrogenase A, partial (62%)  
462 TC11357 similar to UP|Q90YU0 (Q90YU0) Ribosomal protein L27a, partial (35%)  
463 CK422530  
464 CK412286  
465 CK410497  
466 CK421942  
467 TC12992 homologue to UP|Q5TSW7 (Q5TSW7) ENSANGP00000028399 (Fragment), partial (4%)  
468 BM029425  
469 CK417653  
470 CV989500  
471 BM425473  
472 CK419045  
473 TC10145 UP|Q6IQ86 (Q6IQ86) Zgc:86903, complete  
474 CK423443  
475 CK412533  
476 TC10166 weakly similar to UP|Q75WB8 (Q75WB8) Chitinase2, partial (23%)  
477 CK410597  
478 TC12374 similar to UP|Q6E5T6 (Q6E5T6) Claudin 31, partial (20%)  
479 CV988828  
480 TC11630 homologue to UP|PAB1\_BOVIN (P61286) Polyadenylate-binding protein 1  
481 BE469443  
482 CK410085  
483 TC10310 similar to UP|Q92101 (Q92101) Glutathione S-transferase , partial (93%)  
484 BE468973  
485 TC11100 homologue to UP|Q9DGR7 (Q9DGR7) MKK4, partial (15%)  
486 CK424919  
487 BE212939  
488 TC12322 similar to UP|Q6NYL9 (Q6NYL9) Protein kinase C and casein kinase substrate in neurons 2  
489 TC11852 homologue to UP|Q6NZZ0 (Q6NZZ0) Timm17a protein, complete  
490 CF263575  
491 CK418995  
492 TC11554 similar to UP|Q71SZ8 (Q71SZ8) Cytochrome c oxidase subunit VIc, partial (96%)  
493 TC13906  
494 CK413642  
495 CK425841  
496 CB937770  
497 BM494167  
498 TC11801 weakly similar to GB|CAA28379.1|673431|MMADIG precursor adipsin {Mus musculus;}  
499 BE213107  
500 TC9995 similar to UP|Q6PEI9 (Q6PEI9) Collagen, type I, alpha 3, partial (41%)  
501 CK422304  
502 CK418186  
503 TC11449 similar to UP|Q802Z9 (Q802Z9) Zgc:55489, partial (96%)  
504 CK426353  
505 CK419272  
506 CK414317  
507 CK411058  
508 CK415291  
509 TC11154 similar to UP|Q6IQU2 (Q6IQU2) Zgc:86610, partial (94%)

510 CK416908  
511 CK412081  
512 CK423709  
513 TC12266 similar to UP|Q8YCG1 (Q8YCG1) IOLB PROTEIN, partial (6%)  
514 CK413699  
515 CK416284  
516 BE468724  
517 TC10642 similar to UP|Q6P0U7 (Q6P0U7) Zgc:77730 protein, partial (25%)  
518 TC13593 similar to UP|Q5XJP4 (Q5XJP4) Zgc:101710, partial (95%)  
519 CK421749  
520 CK422565  
521 BM494355  
522 TC11962 similar to UP|Q6GQM3 (Q6GQM3) Proteasome (Prosome, macropain) subunit, alpha type, 6b  
523 CK415720  
524 CV991806  
525 CK415981  
526 CF263123  
527 CK421272  
528 BE212725  
529 CK420733  
530 BM027998  
531 CK416576  
532 TC13947 homologue to UP|Q26165 (Q26165) Beta tubulin, partial (49%)  
533 TC12586 similar to UP|Q8I727 (Q8I727) TcC31.32, partial (9%)  
534 TC14137 weakly similar to UP|Q9I933 (Q9I933) Complement C4-1, partial (5%)  
535 TC11700 homologue to UP|Q6D114 (Q6D114) Zgc:86841, partial (97%)  
536 TC11728 similar to UP|Q8WY42 (Q8WY42) Splicing-related factor RNPS1, complete  
537 CK420426  
538 BM438197  
539 CK412787  
540 CK418013  
541 CB940530  
542 CK422383  
543 TC10926  
544 CK420633  
545 TC13447  
546 CK422657  
547 BM496460  
548 CV995745  
549 TC10733 similar to GB|CAA46992.1|63803|GGTENS tensin {Gallus gallus;} , partial (74%)  
550 CV989527  
551 TC12918 homologue to UP|Q90YU0 (Q90YU0) Ribosomal protein L27a, complete  
552 TC10050 similar to UP|BHB2\_HUMAN (O14503) Class B basic helix-loop-helix protein 2 (bHLHB2)  
553 TC12455  
554 TC13018 homologue to UP|Q7T2A8 (Q7T2A8) SH3 domain binding glutamic acid-rich protein like, complete  
555 CK417940  
556 CK414352  
557 CK417953  
558 CK415447  
559 TC9872 similar to UP|O62896 (O62896) MHC class I alpha chain, partial (92%)  
560 TC13508  
561 TC11649 homologue to PIR|A31486|A31486 translation initiation factor eIF-5A [validated] - rabbit

562 CB940020  
563 BM028956  
564 CK417445  
565 TC10213 homologue to UP|Q9N178 (Q9N178) Type X collagen, partial (3%)  
566 CB940562  
567 TC14028 similar to UP|Q6IQG6 (Q6IQG6) Hprt1 protein, partial (93%)  
568 CK417457  
569 TC10304 similar to UP|Q922L2 (Q922L2) Apoptosis inhibitor 5, partial (63%)  
570 CK416950  
571 CK413545  
572 CF262312  
573 CF262283  
574 CK419326  
575 TC11427  
576 TC12246 homologue to UP|Q6PGZ8 (Q6PGZ8) Xab2 protein, partial (41%)  
577 CK420762  
578 CV989458  
579 CF262254  
580 CK415487  
581 TC12016 similar to UP|PEN2\_BRARE (Q8JHF0) Gamma-secretase subunit Pen-2  
582 CK410382  
583 CK418895  
584 CK412917  
585 CK421403  
586 TC11844 UP|Q6TXI9 (Q6TXI9) LRRGT00010, partial (13%)  
587 CK424066  
588 CF261762  
589 CK421327  
590 CK415932  
591 CV991700  
592 TC13168 UP|Q64150 (Q64150) Nuclear localization signal binding protein, partial (15%)  
593 TC11858 similar to UP|LPP1\_CAVPO (O88956) Lipid phosphate phosphohydrolase 1  
594 TC10241 homologue to UP|Q6PH06 (Q6PH06) Zgc:63469, partial (28%)  
595 TC11920  
596 CK416378  
597 TC12368 weakly similar to UP|Q6P2I4 (Q6P2I4) CSGlcA-T protein, partial (35%)  
598 CF262214  
599 CK418588  
600 CK423077  
601 TC10977 homologue to UP|Q70V42 (Q70V42) Small inducible cytokine B14, complete  
602 CK420354  
603 BM439086  
604 CK410000  
605 TC12323  
606 TC13685 similar to GB|AAC50902.1|1732075|HSU75309 TBP-associated factor {Homo sapiens;} , partial  
607 CK417867  
608 CK423027  
609 CV996288  
610 CK417206  
611 CK419741  
612 CV989790  
613 CV994752

|     |                                                                                                      |
|-----|------------------------------------------------------------------------------------------------------|
| 614 | CK421855                                                                                             |
| 615 | CF262107                                                                                             |
| 616 | CK416917                                                                                             |
| 617 | BM495392                                                                                             |
| 618 | CK423611                                                                                             |
| 619 | BM494127                                                                                             |
| 620 | BE470257                                                                                             |
| 621 | CK413375                                                                                             |
| 622 | CK413346                                                                                             |
| 623 | BM495935                                                                                             |
| 624 | TC11405 homologue to UP Q6IQX1 (Q6IQX1) Myosin, heavy polypeptide 2, fast muscle specific, partial   |
| 625 | CK416721                                                                                             |
| 626 | TC12061                                                                                              |
| 627 | CV987397                                                                                             |
| 628 | TC11218 similar to UP GNPI_HUMAN (P46926) Glucosamine-6-phosphate isomerase                          |
| 629 | CF262100                                                                                             |
| 630 | BE468360                                                                                             |
| 631 | CK415427                                                                                             |
| 632 | CK425916                                                                                             |
| 633 | CF263523                                                                                             |
| 634 | TC11629 similar to UP Q5U3R7 (Q5U3R7) Zgc:101706, partial (57%)                                      |
| 635 | TC14114 similar to UP ATPD_BOVIN (P05630) ATP synthase delta chain, mitochondrial precursor          |
| 636 | CK413474                                                                                             |
| 637 | BM438645                                                                                             |
| 638 | CK423208                                                                                             |
| 639 | CK415965                                                                                             |
| 640 | TC13370 UP Q8UWK5 (Q8UWK5) Novel immune-type receptor 10, complete                                   |
| 641 | CK423965                                                                                             |
| 642 | CV991331                                                                                             |
| 643 | CV993394                                                                                             |
| 644 | CK415728                                                                                             |
| 645 | BM438893                                                                                             |
| 646 | CK420892                                                                                             |
| 647 | BM494399                                                                                             |
| 648 | TC12632                                                                                              |
| 649 | CK411705                                                                                             |
| 650 | BE468535                                                                                             |
| 651 | CK415296                                                                                             |
| 652 | TC13133                                                                                              |
| 653 | CK422123                                                                                             |
| 654 | CK416846                                                                                             |
| 655 | TC9851 similar to UP EPCR_BOVIN (Q28105) Endothelial protein C receptor precursor                    |
| 656 | TC11055 similar to UP Q63ZM4 (Q63ZM4) Armet protein, partial (92%)                                   |
| 657 | TC10568 homologue to GB AAC09367.1 3005758 AF055028 RNA polymerase II 140 kDa subunit (Homo sapiens) |
| 658 | CK413782                                                                                             |
| 659 | CF262619                                                                                             |
| 660 | CK418743                                                                                             |
| 661 | CK415521                                                                                             |
| 662 | CK415914                                                                                             |
| 663 | CK425717                                                                                             |
| 664 | CF263155                                                                                             |
| 665 | TC11203 similar to GB AAH02920.1 12804133 BC002920 DC-TM4F2 protein (Homo sapiens) , partial (60%)   |

666 CK411876  
667 BE469478  
668 TC10005 weakly similar to UP|Q98SS1 (Q98SS1) Egg envelope protein ZP2 variant C, partial (73%)  
669 BM029369  
670 CK411349  
671 CB940024  
672 CF262870  
673 CK418857  
674 TC13116 similar to UP|CLDY\_BRARE (Q9YH91) Claudin-like protein ZF-A89, partial (97%)  
675 TC12857 similar to UP|ATA1\_MAKNI (P70083) Sarcoplasmic/endoplasmic reticulum calcium ATPase 1  
676 CK417433  
677 TC10124 weakly similar to UP|IBP7\_HUMAN (Q16270) Insulin-like growth factor binding protein 7 precursor  
678 TC14194 UP|RL41\_CYP4A (Q6YLY4) 60S ribosomal protein L41, partial (72%)  
679 CK417885  
680 BE470181  
681 CV991178  
682 TC11446  
683 CV992622  
684 CK409752  
685 TC13561  
686 BE468927  
687 TC11856 homologue to UP|Q9Z1W5 (Q9Z1W5) Stress-associated endoplasmic reticulum protein 1 (Mus musculus)  
688 CB940799  
689 CV993994  
690 CK411609  
691 CK415182  
692 CK412572  
693 TC11761 homologue to UP|Q7SXS5 (Q7SXS5) Zgc:63844, complete  
694 TC10271 similar to UP|Q8CHA2 (Q8CHA2) MKIAA1463 protein (Fragment), partial (54%)  
695 BE470280  
696 CK414672  
697 CB937869  
698 CK413032  
699 CK416673  
700 CV989869  
701 CK418231  
702 TC11694 homologue to UP|Q7T2P2 (Q7T2P2) Chaperonin containing TCP1, subunit 3 (Gamma)  
703 TC11327 UP|Q7ZVK2 (Q7ZVK2) Ubiquitin-conjugating enzyme E2G 1, complete  
704 TC13811 similar to UP|Q7TMM3 (Q7TMM3) Arl6ip2 protein, partial (67%)  
705 CV995877  
706 CV993679  
707 TC12109 homologue to UP|Q9BU59 (Q9BU59) Smu-1 suppressor of mec-8 and unc-52 homolog  
708 TC10013 UP|Q90YV9 (Q90YV9) Ribosomal protein L10, complete  
709 CK414898  
710 BM438578  
711 TC13872 similar to UP|Q6DHN6 (Q6DHN6) Zgc:92198, partial (48%)  
712 TC11984 similar to UP|Q8UUT4 (Q8UUT4) DMbeta1 (Glycoprotein M6Aa), partial (77%)  
713 BM494674  
714 CK411239  
715 CV988969  
716 CK424328  
717 CV988772

718 TC11683 UP|Q8R4X0 (Q8R4X0) Fibroblast growth factor-like factor-4D (Fragment), partial (6%)  
719 CK416229  
720 CK423587  
721 TC11961 homologue to UP|Q7S1G6 (Q7S1G6) Predicted protein, partial (5%)  
722 CK418305  
723 BE212985  
724 CV995070  
725 TC11894 homologue to UP|Q7ZVZ4 (Q7ZVZ4) Regulator of nonsense transcripts 1, partial (25%)  
726 CK410790  
727 TC14020  
728 CK409724  
729 TC9903 similar to UP|Q6DF51 (Q6DF51) HUS1 checkpoint homolog, partial (84%)  
730 CK410197  
731 BE469698  
732 BM028060  
733 CV990614  
734 CK412023  
735 TC13039  
736 CV988811  
737 CV995738  
738 CV993196  
739 TC11608 weakly similar to UP|APA1\_BRARE (O42363) Apolipoprotein A-I precursor (Apo-AI) (ApoA-I)  
740 CK417036  
741 TC12996 homologue to UP|O57150 (O57150) H88, partial (30%)  
742 TC10958 similar to UP|ITB1\_CHICK (P07228) Integrin beta-1 precursor (CSAT antigen) (JG22 antigen)  
743 CV989517  
744 TC12004  
745 CK420077  
746 CK410714  
747 CK413660  
748 CK418479  
749 TC9912 similar to UP|Q6TNV0 (Q6TNV0) Cytochrome c oxidase subunit IV isoform 1, complete  
750 CK414943  
751 CK423335  
752 TC11559 homologue to UP|Q7SXT9 (Q7SXT9) Eukaryotic translation initiation factor 2 gamma, complete  
753 CK417367  
754 CK421511  
755 CB939526  
756 CV990183  
757 CF263074  
758 CK419874  
759 CB937095  
760 CV994510  
761 TC13787  
762 TC13173 homologue to UP|Q7T385 (Q7T385) ATPase, H<sup>+</sup> transporting, lysosomal, V1 subunit C, isoform 1  
763 CK420312  
764 CF263195  
765 CK416401  
766 TC12098 homologue to UP|Q803C2 (Q803C2) Db83 protein, partial (98%)  
767 TC10066 GB|AAK95190.1|15294027|AF402816 40S ribosomal protein S8 {Ictalurus punctatus;} , complete  
768 CK422172  
769 BM425070



770 BM496409  
771 TC11862 homologue to UP|Q6IQH4 (Q6IQH4) Zgc:86762, partial (97%)  
772 CK413689  
773 TC10564 similar to UP|Q9V3Y5 (Q9V3Y5) CG4119-PA (BcDNA.LD23634), partial (5%)  
774 CB939288  
775 TC13588 similar to UP|ROM\_MOUSE (Q9D0E1) Heterogeneous nuclear ribonucleoprotein M (hnRNP M)  
776 BM424909  
777 CK414407  
778 TC10877 homologue to UP|Q6IMK3 (Q6IMK3) Rbj, partial (46%)  
779 BM028933  
780 CV993045  
781 TC14124 similar to GB|AAC16002.1|3126878|AF061832 M4 protein deletion mutant {Homo sapiens;}  
782 CK422106  
783 CK412704  
784 TC10034 similar to UP|O73911 (O73911) K123 protein precursor, partial (10%)  
785 CK411961  
786 TC12757  
787 CK415717  
788 CK411287  
789 TC11643 similar to UP|Q6IQ59 (Q6IQ59) Ubiquinol-cytochrome c reductase core protein II, partial  
790 CV991583  
791 CK420612  
792 CV987722  
793 BM425409  
794 CK419566  
795 CK419265  
796 CK414505  
797 TC12112 similar to UP|Q6DRK5 (Q6DRK5) Cotamer alpha, partial (44%)  
798 CB939259  
799 CK418299  
800 CK419145  
801 CK420715  
802 CK410042  
803 CK421258  
804 CK425198  
805 CK420787  
806 TC13009 similar to UP|Q804G7 (Q804G7) Annexin 4 (Annexin A4), complete  
807 CV989758  
808 TC11669 homologue to UP|Q6TLG9 (Q6TLG9) Protein tyrosine phosphatase type IVA, member 2, partial  
809 CK414409  
810 CK418281  
811 CK417029  
812 CK425439  
813 BM425097  
814 BE470468  
815 CK412463  
816 CK414533  
817 CK415405  
818 TC10549 similar to UP|Q629V3 (Q629V3) 2-oxoisovalerate dehydrogenase, E2 component, dihydrolipamide  
819 TC10892 similar to UP|Q15598 (Q15598) Titin (Fragment), partial (5%)  
820 CK418688  
821 TC13434

|     |                                                                                                         |
|-----|---------------------------------------------------------------------------------------------------------|
| 822 | CK419980                                                                                                |
| 823 | BM494700                                                                                                |
| 824 | CV994153                                                                                                |
| 825 | CK418380                                                                                                |
| 826 | CK414093                                                                                                |
| 827 | CK425278                                                                                                |
| 828 | CK412199                                                                                                |
| 829 | CF262063                                                                                                |
| 830 | CK419066                                                                                                |
| 831 | CF263237                                                                                                |
| 832 | CK415594                                                                                                |
| 833 | TC14090 similar to UP Q719N3 (Q719N3) Macrophage/microglia activation-associated factor (Maf protein)   |
| 834 | TC14148                                                                                                 |
| 835 | TC12939 UP O62895 (O62895) MHC class I alpha chain, complete                                            |
| 836 | CK423194                                                                                                |
| 837 | TC10913 UP Q64150 (Q64150) Nuclear localization signal binding protein, partial (8%)                    |
| 838 | TC12244 weakly similar to UP RT29_HUMAN (P51398) Mitochondrial 28S ribosomal protein S29 (S29mt)        |
| 839 | BM495124                                                                                                |
| 840 | TC12650 weakly similar to GB AAL28433.1 16768428 AY060885 GM04427p {Drosophila melanogaster;}           |
| 841 | TC10139 UP P2AB_RABIT (P11611) Serine/threonine protein phosphatase 2A, catalytic subunit, beta isoform |
| 842 | BM495074                                                                                                |
| 843 | CK413355                                                                                                |
| 844 | CK421561                                                                                                |
| 845 | TC12548                                                                                                 |
| 846 | CK424281                                                                                                |
| 847 | CV993604                                                                                                |
| 848 | CK421324                                                                                                |
| 849 | BM029499                                                                                                |
| 850 | TC10389 weakly similar to UP Q9W6G2 (Q9W6G2) Fertilization envelope outer layer protein, partial        |
| 851 | TC12563 weakly similar to GB AAC51775.2 21903712 HSU65090 carboxypeptidase D {Homo sapiens;}            |
| 852 | CV987774                                                                                                |
| 853 | CK412666                                                                                                |
| 854 | BM424721                                                                                                |
| 855 | CV992474                                                                                                |
| 856 | CK414492                                                                                                |
| 857 | BM439102                                                                                                |
| 858 | BE470403                                                                                                |
| 859 | TC10098 similar to UP Q7T2N0 (Q7T2N0) Interferon-inducible protein Gig2, partial (91%)                  |
| 860 | CF263513                                                                                                |
| 861 | TC13730 homologue to UP Q6DRI2 (Q6DRI2) Clatherin heavy chain, partial (31%)                            |
| 862 | CF263639                                                                                                |
| 863 | CK413069                                                                                                |
| 864 | TC13196 homologue to UP Q9I9E9 (Q9I9E9) EIF2 alpha subunit (Eukaryotic translation initiation factor 2) |
| 865 | TC10758 similar to UP Q8MS43 (Q8MS43) RE09079p, partial (3%)                                            |
| 866 | CK415474                                                                                                |
| 867 | BE468292                                                                                                |
| 868 | TC12660 similar to UP Q7SZQ8 (Q7SZQ8) Telomerase binding protein, p23, partial (83%)                    |
| 869 | TC13962 similar to UP Q8QGB2 (Q8QGB2) VHSV-induced protein-6, partial (55%)                             |
| 870 | CF263538                                                                                                |
| 871 | TC11655 homologue to UP O42447 (O42447) Id1 protein, partial (91%)                                      |
| 872 | TC12764 similar to UP Q63647 (Q63647) Proline rich protein, partial (15%)                               |
| 873 | CK426167                                                                                                |

874 CK422162  
875 CK421105  
876 TC13061 homologue to UP|Q6DGZ5 (Q6DGZ5) Zgc:92709, partial (51%)  
877 CK426149  
878 TC13125 weakly similar to UP|Q9WUJ3 (Q9WUJ3) Myomegalin, partial (3%)  
879 CK409841  
880 CV990296  
881 CK420547  
882 TC11869 UP|Q67Z20 (Q67Z20) CC chemokine SCYA102, complete  
883 CK417324  
884 CK413250  
885 CK415188  
886 CV994607  
887 TC10956 similar to UP|Q6DGT6 (Q6DGT6) Zgc:92778, partial (75%)  
888 TC10731 similar to UP|Q6NZ32 (Q6NZ32) Zgc:77439 (Dimethylalanine monooxygenase-like), partial (53%)  
889 CK424320  
890 CK425385  
891 TC13278 similar to UP|Q8UVQ5 (Q8UVQ5) X-box binding protein 1A (X-box binding protein 1), partial  
892 CK413045  
893 CK417241  
894 CK414428  
895 TC10995  
896 TC10621 homologue to UP|Q7ZVP2 (Q7ZVP2) RAB5C, member RAS oncogene family, partial (92%)  
897 BM494934  
898 TC13732  
899 CK414323  
900 CK416201  
901 CV995380  
902 TC13686 OMNI|NTL01PA0883|CAB49807.1|5458318| desulfoferrodoxin {Pyrococcus abyssi;} , partial (8%)  
903 TC11080 similar to PIR|A54021|A54021 phosphotyrosyl phosphatase activator PTPA - human {Homo sapiens}  
904 TC12242 similar to UP|RCAS\_MOUSE (Q9D0V7) Receptor-binding cancer antigen expressed on SiSo cells  
905 TC10936  
906 TC12956 UP|Q6YNX6 (Q6YNX6) Calmodulin 2, complete  
907 TC10572 similar to UP|Q7T028 (Q7T028) GDP-fucose protein O-fucosyltransferase 1 , partial (29%)  
908 TC10659  
909 CK424015  
910 CF262038  
911 CK416138  
912 CV988531  
913 CV990686  
914 TC13332 weakly similar to GB|AAC51784.1|2507613|HSU75329 serine protease {Homo sapiens;} , partial  
915 TC10288 homologue to UP|O57513 (O57513) Serine/threonine protein kinase, partial (32%)  
916 CK416793  
917 CK413757  
918 CK414239  
919 CV990666  
920 CK417461  
921 TC13131 similar to UP|Q80XP4 (Q80XP4) Uap111 protein (Fragment), partial (74%)  
922 CK416370  
923 CK423502  
924 TC12335 UP|Q8DNE2 (Q8DNE2) Acylphosphate phosphohydrolase , partial (11%)  
925 TC10687 similar to UP|Q66KC4 (Q66KC4) MGC89719 protein, partial (44%)

926 CK420760  
927 TC10699 homologue to UP|Q6NSM5 (Q6NSM5) Zgc:85981, partial (52%)  
928 CK416227  
929 CK424427  
930 TC13826 homologue to UP|P300\_HUMAN (Q09472) E1A-associated protein p300 , partial (3%)  
931 TC9962 similar to UP|Q6P3K5 (Q6P3K5) Ckii protein, partial (42%)  
932 TC11952 similar to UP|Q5W0B9 (Q5W0B9) TBC1 domain family, member 4, partial (8%)  
933 TC11419 weakly similar to UP|Q90WF7 (Q90WF7) Warm-temperature-acclimation-related-65 kDa-protein protein  
934 CK413752  
935 TC12974 similar to UP|MOT3\_YEAST (P54785) Zinc finger protein MOT3/HMS1, partial (6%)  
936 CK423456  
937 CK414783  
938 TC9937 homologue to UP|Q6PBW6 (Q6PBW6) Chaperonin containing TCP1, subunit 2 (Beta), complete  
939 CK423200  
940 CK426220  
941 TC9891 homologue to UP|RBM8\_HUMAN (Q9Y5S9) RNA-binding protein 8A (RNA binding motif protein 8A)  
942 CK412815  
943 CV988285  
944 CK426305  
945 TC11297 similar to GB|BAA92493.1|7229115|AB036524S9 ribonucleotide reductase {Homo sapiens;}  
946 TC12936 UP|Q6ZWL8 (Q6ZWL8) Mus musculus 7 days embryo nullipotent stem cell CRL-2070 NE cDNA, RIKEN  
947 TC10719 homologue to UP|Q7T3E6 (Q7T3E6) Bmi1b protein, partial (56%)  
948 CK424615  
949 TC10393 similar to UP|Q6RIA7 (Q6RIA7) 14-alpha demethylase, partial (38%)  
950 CV991835  
951 CK423322  
952 BM027990  
953 BE212865  
954 TC13090 UP|Q6E5U7 (Q6E5U7) Fas receptor, complete  
955 CV988152  
956 TC12558 weakly similar to UP|Q7T2N0 (Q7T2N0) Interferon-inducible protein Gig2, partial (73%)  
957 BE213054  
958 TC13051 similar to UP|Q8AV10 (Q8AV10) Sdf1a (Chemokine ligand 12), partial (78%)  
959 TC10645 homologue to UP|Q6NY88 (Q6NY88) Zgc:76972, partial (92%)  
960 CK414174  
961 CB938337  
962 CK422701
