# Supplementary material for: AgBase: a functional genomics resource for agriculture
Source: BMC Genomics. 2006 Sep 8;7:229. doi: 10.1186/1471-2164-7-229 (PMC1618847; doi:10.1186/1471-2164-7-229)
Supplement: Additional File 3 — Location of ePST47 in P. multocida Pm70 genome. Region of PM70 genome coding for accA and guaA genes and the 5' end of PMO291 (A). The position in genome is on the left hand side; DNA sequence is shown above; amino acid sequence below; direction of reading frames shown by arrows. The ePST47 is located in the intergenic region between accA and guaA. The figure is taken directly from NCBI nucleotide database graph view with the accession number NC_002663. An expanded view of intergenic region between accA and guaA including ePST47, which runs in the opposite direction to accA, guaA and PMO291 (arrowed) is also shown (B). The overlapping peptides used to identify ePST47 are indicated using bold type (PRIDE accession number pending). This region of the PM70 genome also has 60% identity (* indicates identical nucleotides) and 74% similarity at the protein level with the Haemophilus ducreyi hypothetical protein HD_1218 (Genbank accession AAP96060). [file 1471-2164-7-229-S3.pdf]

B.

Pm70 GCAAGTGATTATTGGCGGTGTGTGTGACGGAATAAGTCAATACTAATCAATTAACATTAA 334494  
ePST47 GCAAGTGATTATTGGCGGTGTGTGTGACGGAATAA----- 393  
HD 1218 -----
